# Supplementary material for: Structure and Topology Prediction of Phage Adhesion Devices Using AlphaFold2: The Case of Two Oenococcus oeni Phages
Source: MDPI journal article supplement (doi:10.3390/microorganisms9102151), 2021-10-14
Supplement: s1 [file s1]

**Structure and topology prediction of phage adhesion devices using AlphaFold2:  
the case of two *Oenococcus oeni* phages**

**Adeline Goulet\* and Christian Cambillau**

**\*Correspondence: [adeline.goulet@univ-amu.fr](mailto:adeline.goulet@univ-amu.fr); Tel.: 0033.491825590**

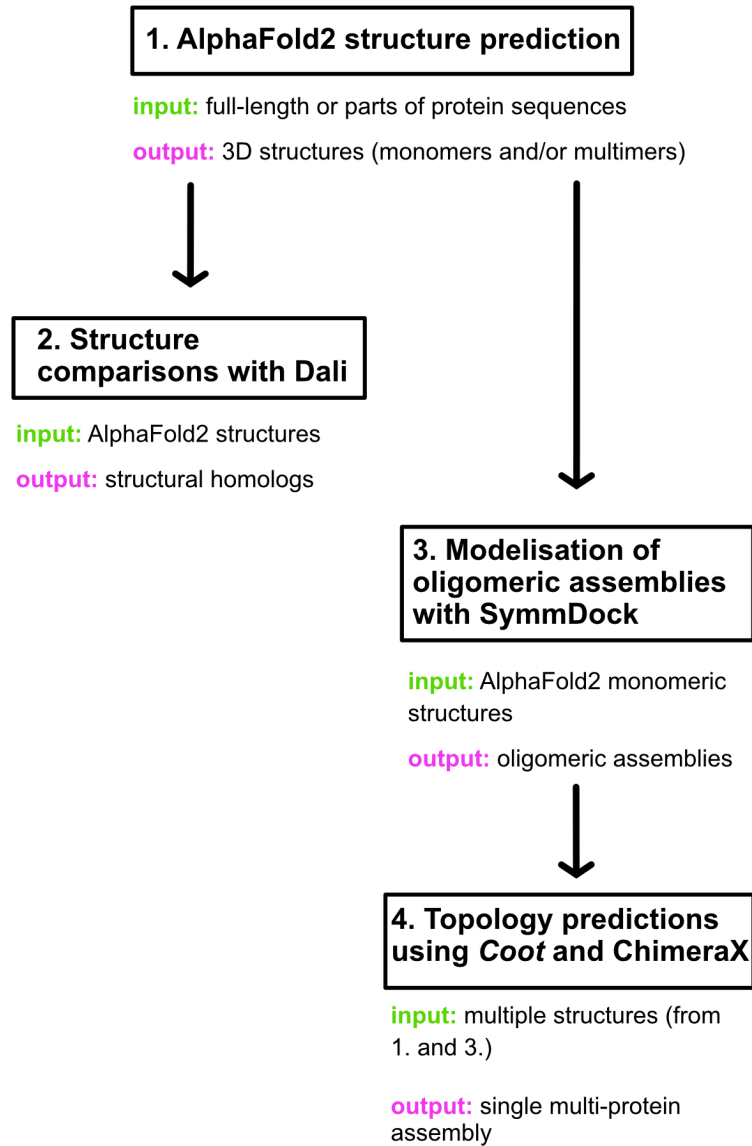

**Figure S1. Workflow for structure and topology predictions.** The different steps carried out for the structure and topology predictions are presented. The software used as well as their inputs and outputs are indicated.

**A**

full-length sequence (1-659)

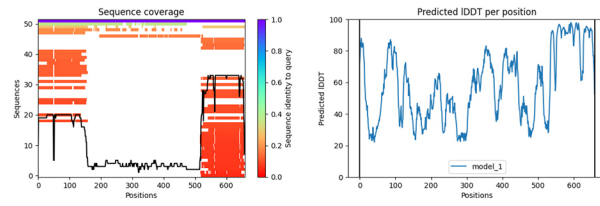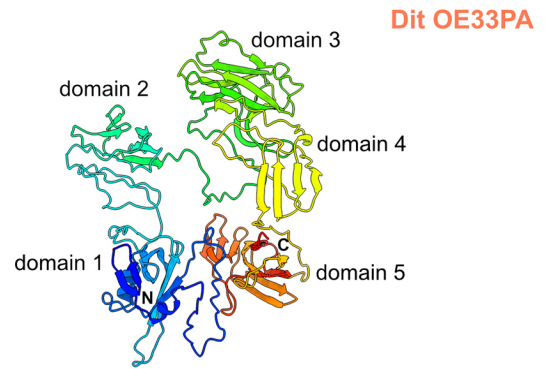

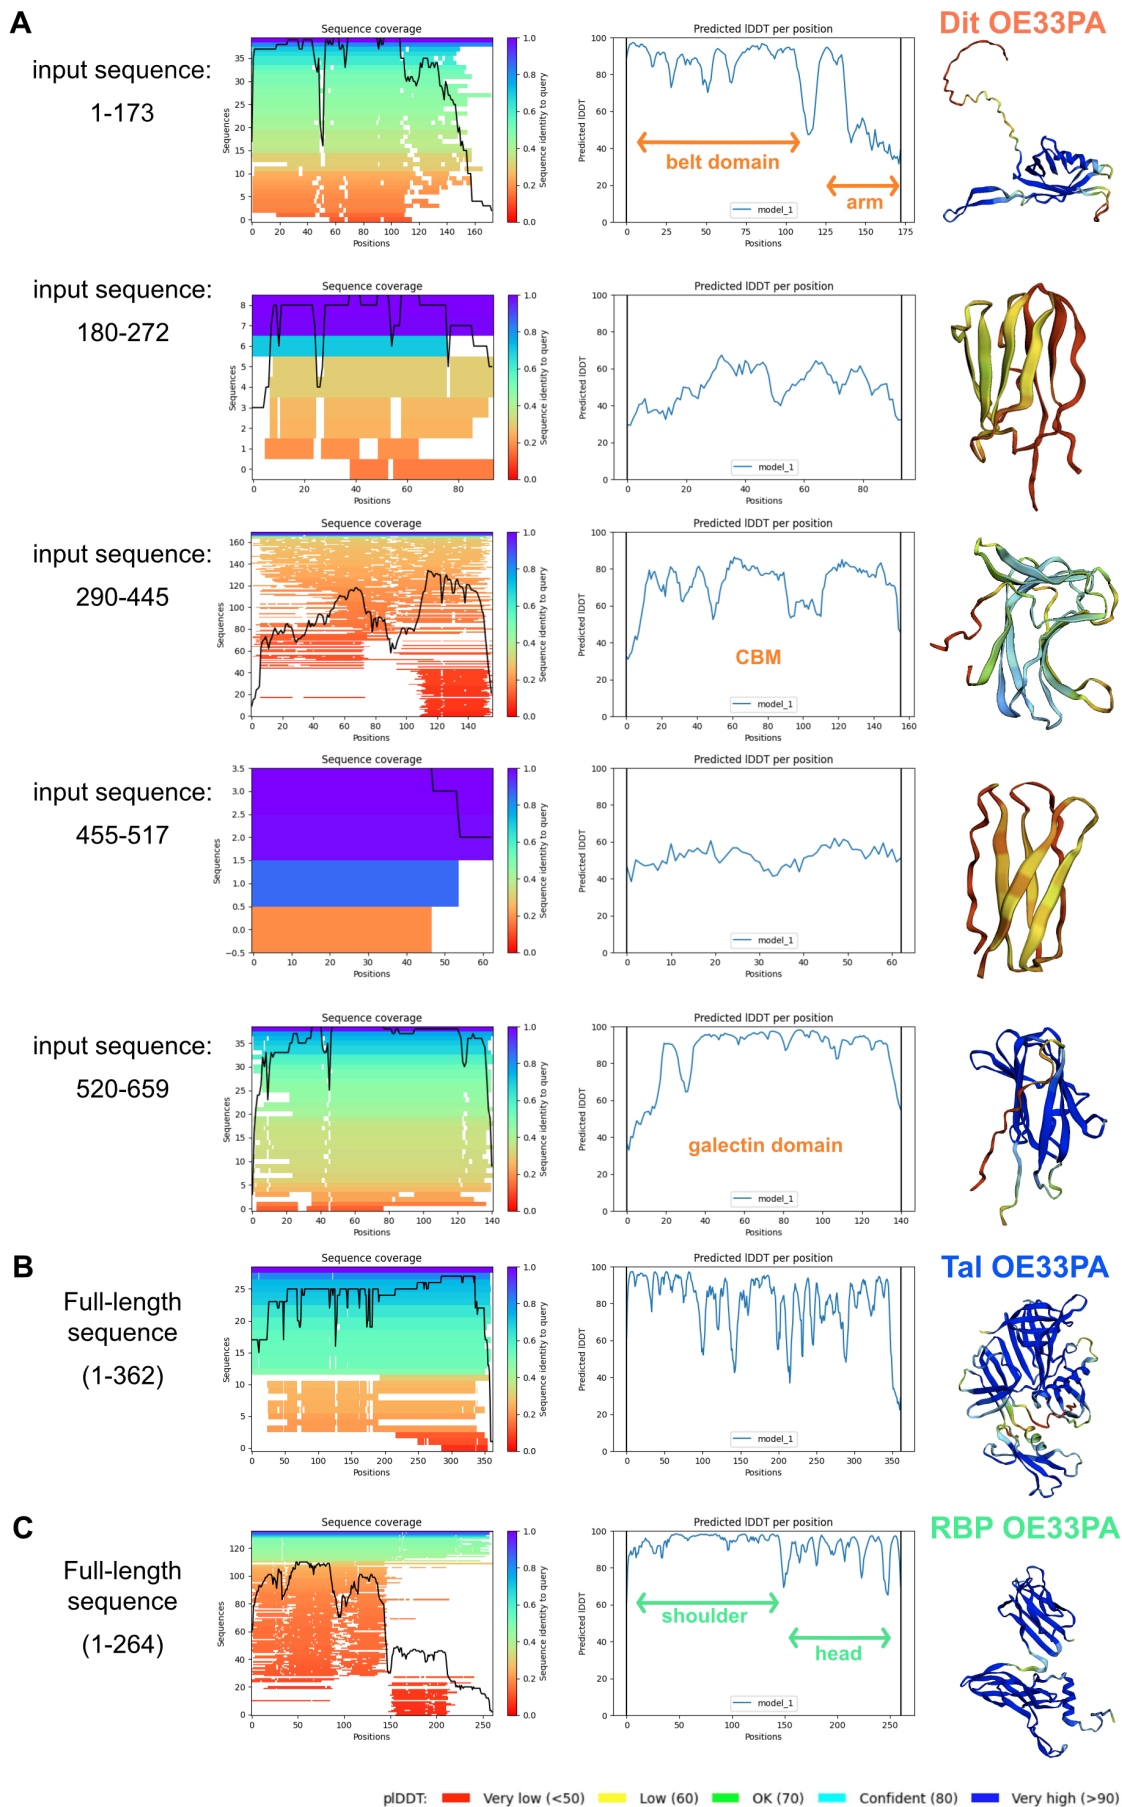

**Figure S3. AlphaFold2 confidence measures for OE33PA Dit domains, Tal and RBP. of AlphaFold2 structure predictions of OE33PA Dit, Tal, and RBP. A.** The Dit sequence was split into five parts and each of them were submitted to AlphaFold2. Left. The plots report the number of sequences, sequence coverage, and sequence identity to query. Right. Predicted

lDDT per position. AlphaFold2 predicted 3D structures are shown (the color code is indicated). B. The full-length Tal sequence was submitted to AlphaFold2. Left. This plot reports the number of sequences, sequence coverage, and sequence identity to query. Right. Predicted lDDT per position. The AlphaFold2 predicted 3D structure is shown (the color code is indicated). C. The full-length RBP sequence was submitted to AlphaFold2. Left. This plot reports the number of sequences, sequence coverage, and sequence identity to query. Right. Predicted pDDT per position. The AlphaFold2 predicted 3D structures is shown (the color code is indicated).

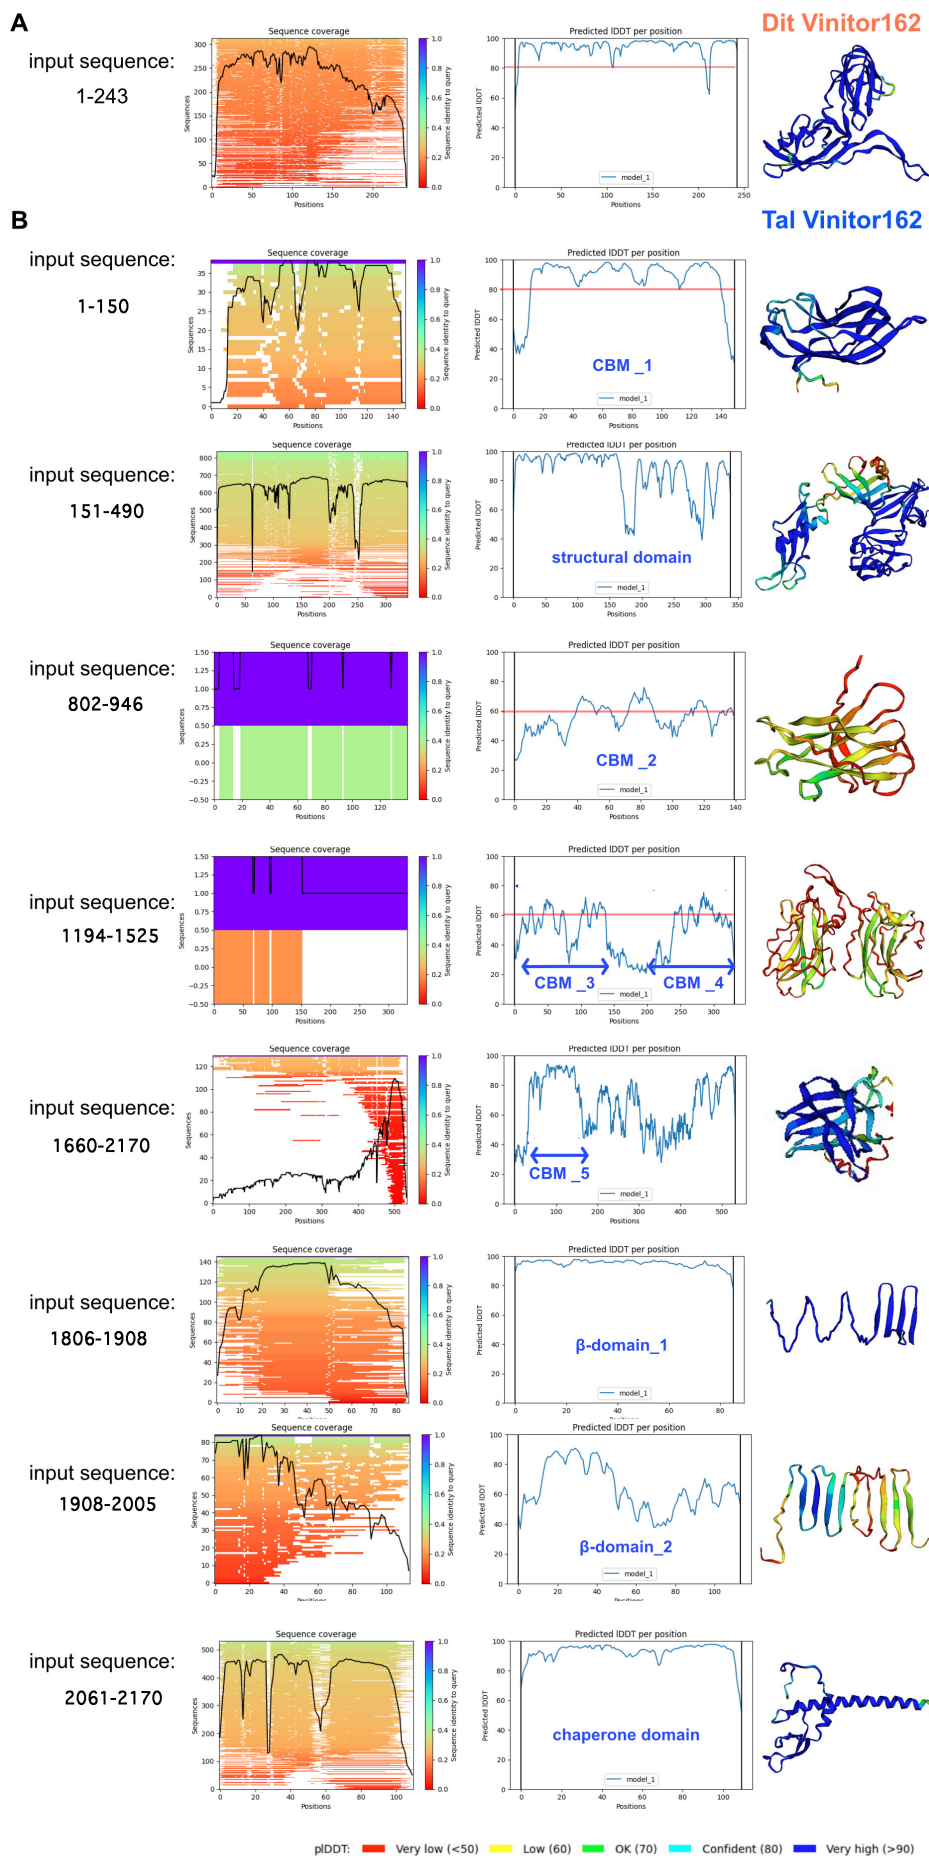

**Figure S4. AlphaFold2 confidence measures for Vinitor162 Dit and Tal domains.** A. The full-length Dit sequence was submitted to AlphaFold2. Left. This plot reports the number of sequences, sequence coverage, and sequence identity to query. Right. Predicted IDDT per

position. The AlphaFold2 predicted 3D structure is shown (the color code is indicated). B. The Tal sequence was split into eight parts and each of them were submitted to AlphaFold2. Left. The plots report the number of sequences, sequence coverage, and sequence identity to query. Right. Predicted IDDT per position. AlphaFold2 predicted 3D structures are shown (the color code is indicated).

**Table S1. Comparison of domain predictions by HHpred and AlphaFold2.**

| Domains                                                    | HHpred boundaries<br>(PDB ID;<br>probability)                                                                                                                                                                                                                         | AlphaFold2<br>boundaries | Dali<br>PDB ID•Z-score•<br>rmsd (Å)•aligned residues                                                                                                                                                                                 |
|------------------------------------------------------------|-----------------------------------------------------------------------------------------------------------------------------------------------------------------------------------------------------------------------------------------------------------------------|--------------------------|--------------------------------------------------------------------------------------------------------------------------------------------------------------------------------------------------------------------------------------|
| <b>OE33PA Dit</b>                                          |                                                                                                                                                                                                                                                                       |                          |                                                                                                                                                                                                                                      |
| <b>belt</b>                                                | 1-166<br>(2wzp, <i>L. lactis</i> phage<br>p2; 99.9%)<br><br>43-281<br>(2x8k, <i>B. subtilis</i><br>phage SPP1; 92.9%)                                                                                                                                                 | 1-131                    | 2wzp ( <i>L. lactis</i> phage p2)•<br>Z=13.4•rmsd=2.3•121<br><br>2x8k ( <i>B. subtilis</i> phage SPP1)•<br>Z=9.5•rmsd=3.4•112                                                                                                        |
| <b>unknown β-fold</b>                                      | n.i                                                                                                                                                                                                                                                                   | 199-270                  | 2x5p (fibronectin-binding domain)•<br>Z=6•rmsd=3•75                                                                                                                                                                                  |
| <b>CBM</b>                                                 | 286-438<br>(2w5f, CBM22<br>CAZyDB; 95.1%)                                                                                                                                                                                                                             | 305-445                  | 5w6h (tail spike protein)•<br>Z=12.2•rmsd=2.6•131<br><br>1gui (CBM4 CAZyDB)•<br>Z=11.8•rmsd=2.3•130                                                                                                                                  |
| <b>unknown β-fold</b>                                      | n.i                                                                                                                                                                                                                                                                   | 455-517                  | nd                                                                                                                                                                                                                                   |
| <b>galectin</b>                                            | 554-657<br>(2x8k, <i>B. subtilis</i><br>phage SPP1; 96.2%)                                                                                                                                                                                                            | 527-659                  | 2x8k ( <i>B. subtilis</i> phage SPP1)•<br>•Z=12.3•rmsd=2.6•119<br><br>2wzp ( <i>L. lactis</i> phage p2)•<br>•Z=11.9•rmsd=2.6•121                                                                                                     |
| <b>OE33PA Tal</b>                                          |                                                                                                                                                                                                                                                                       |                          |                                                                                                                                                                                                                                      |
| <b>structural<br/>domain<br/>(phage T4 gp27-<br/>like)</b> | 2-359<br>(3gs9, <i>Listeria</i> phage;<br>99.6%)<br><br>27-348<br>(3d37, <i>Neisseria</i><br>phage; 99.4%)<br><br>5-351<br>(6v8i, <i>Staphylococcus</i><br>phage 80α; 99.2%)<br><br>1-347<br>(1wru, phage Mu;<br>99.1%)<br><br>1-349<br>(3cdd, phage MuSo2;<br>99.1%) | 1-362                    | 2wzp ( <i>L. lactis</i> phage p2)•<br>Z=19.7•rmsd=4.4•300<br><br>3d37 ( <i>Neisseria</i> phage)•<br>Z=16.3•rmsd=4•267<br><br>3cdd (phage MuSo2)•<br>Z=14.9•rmsd=4.1•246<br><br>3gs9 ( <i>Listeria</i> phage)•<br>Z=13.9•rmsd=3.8•263 |
| <b>OE33PA RBP</b>                                          |                                                                                                                                                                                                                                                                       |                          |                                                                                                                                                                                                                                      |
| <b>shoulder</b>                                            | 1-147<br>(4l9b, <i>L. lactis</i> phage<br>1358; 99.94%)                                                                                                                                                                                                               | 1-148                    | 4l92 ( <i>L. lactis</i> phage 1358)•<br>Z=14.9•rmsd=2.2•144                                                                                                                                                                          |
| <b>head</b>                                                | 155-261<br>(6r5w, <i>Listeria</i> phage<br>PSA; 98.4%)<br><br>167-260<br>(4ios, <i>L. lactis</i> phage<br>TP-901; 98.4%)<br><br>130-260                                                                                                                               | 173-261                  | 2fsd ( <i>L. lactis</i> phage Bil170)•<br>Z=11.9•rmsd=2.5•97<br><br>6r5w ( <i>Listeria</i> phage PSA)•<br>Z=10.7•rmsd=2.3•96                                                                                                         |



|                                                   |                                                                                                  |           |                                                                                                            |
|---------------------------------------------------|--------------------------------------------------------------------------------------------------|-----------|------------------------------------------------------------------------------------------------------------|
|                                                   | (2fsd, <i>L. lactis</i> phage Bil170; 97.7%)                                                     |           |                                                                                                            |
|                                                   | 1-260<br>(1zru, <i>L. lactis</i> phage; 99.98%)                                                  |           |                                                                                                            |
| <b>Vinitor162 Dit</b>                             |                                                                                                  |           |                                                                                                            |
| <b>belt and galectin</b>                          | 1-243<br>(2x8k, <i>B. subtilis</i> phage SPP1; 100%)                                             | 1-242     | 2x53 ( <i>L. lactis</i> phage p2)•<br>Z=12.9•rmsd=3.2•210                                                  |
| <b>Vinitor162 Tal</b>                             |                                                                                                  |           |                                                                                                            |
| <b>CBM_1</b>                                      | n.i                                                                                              | 1-150     | 1us2 (CBM15 CAZyDB)•<br>Z=8.3•rmsd=2.6•104                                                                 |
| <b>structural domain<br/>(phage T4 gp27-like)</b> | 129-489<br>(3gs9 <i>Listeria</i> phage; 99.9%)<br>(6v8i, <i>Staphylococcus</i> phage 80α; 99.7%) | 151-489   | 3gs9 ( <i>Listeria</i> phage)•<br>Z=18.3•rmsd=3.8•270                                                      |
| <b>α-helix_1</b>                                  | 490-708<br>(7boz, phage T7 tail fiber; 95.8%)                                                    | 490-801   | nd                                                                                                         |
| <b>CBM_2</b>                                      | 827-940<br>(4xup, CBM22 CAZyDB; 69%)<br>(5w6h, coliphage CBA120 tail spike; 50.6%)               | 802-946   | 4csb (bacterial β-barrel)•<br>Z=4.1•rmsd=3•113                                                             |
| <b>unknown β-fold</b>                             | n.i                                                                                              | 947-1193  | nd                                                                                                         |
| <b>CBM_3</b>                                      | 1194-1333<br>(4xup, CBM22 CAZyDB; 96.9%)<br>(6zpv, GH51 CAZyDB; 95.6%)                           | 1194-1333 | 5w6h (coliphage CBA120 tail spike)•<br>Z=14.3•rmsd=2.3•126<br>2wze (CBM22 CAZyDB)•<br>Z=12.5•rmsd= 2.5•125 |
| <b>linker_2</b>                                   |                                                                                                  | 1334-1407 |                                                                                                            |
| <b>CBM_4</b>                                      | 1407-1525<br>(4xup, CBM22 CAZyDB; 96.9%)                                                         | 1408-1524 | 4bjo (CBM4 CAZyDB)•<br>Z=8.8 • rmsd=2.0•97                                                                 |
| <b>unknown β-fold</b>                             | n.i                                                                                              | 1525-1636 | nd                                                                                                         |
| <b>CBM_5</b>                                      | 1681-1784<br>(4d0q, CBM; 76.1%)<br>(1dyo, CBM22 CAZyDB; 49.2%)                                   | 1637-1791 | 1dyo (CBM22 CAZyDB)•<br>Z=9.4• rmsd=2.8•116                                                                |
| <b>β-domain_1</b>                                 | n.i                                                                                              | 1806-1891 | 4s37 (membrane-piercing spike)•<br>Z=5.1• rmsd=1.5•52                                                      |
| <b>β-domain_2</b>                                 | n.i                                                                                              | 1908-2005 | 4bxq•<br>Z=5.7• rmsd=3.7•86                                                                                |
| <b>C-term</b>                                     | 2065-2170<br>(6f45, phage S16 tail fiber; 96.6%)<br>(3gw6, tail spike; 94.8%)                    | 2061-2170 | 4uw8 (phage T5 tail fiber)•<br>Z=5.4• rmsd=3.1•81<br>3gw6 (tail spike)•<br>Z=5.8• rmsd=2.8•90              |
